# Supplementary material for: Solvothermal synthesis of a dendritic TiNxOy nanostructure for oxygen reduction reaction electrocatalysis
Source: Royal Society of Chemistry journal article supplement (doi:10.1039/c5ra17199g), 2015-01-01
Supplement: c5ra17199g1.pdf [file c5ra17199g1.pdf]

## Supplementary Information:

Solvothermal synthesis of dendritic  $\text{TiN}_x\text{O}_y$  nanostructure for oxygen reduction reaction electrocatalysis

Yaqi Ren, Zhonghua Ren, Jianpeng Li, Shuguang Wang and Jie Yu\*

Shenzhen Engineering Lab for Supercapacitor Materials, Shenzhen Key Laboratory for Advanced Materials, Department Material Science and Engineering, Shenzhen Graduate School, Harbin Institute of Technology, University Town, Shenzhen, China.

E-mail: [jyu@hitsz.edu.cn](mailto:jyu@hitsz.edu.cn)

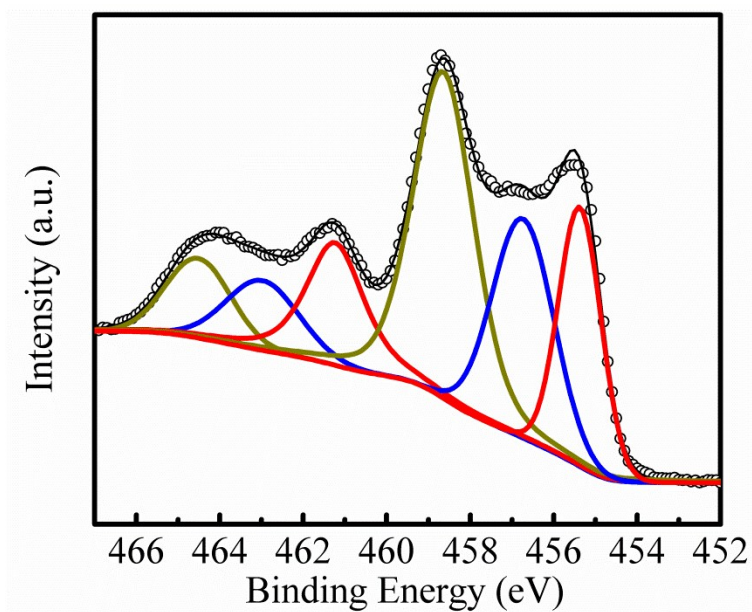

Fig. S1 Ti 2p XPS spectra of  $\text{TiN}_x\text{O}_y$ -900 after argon ion bombardment for 120s

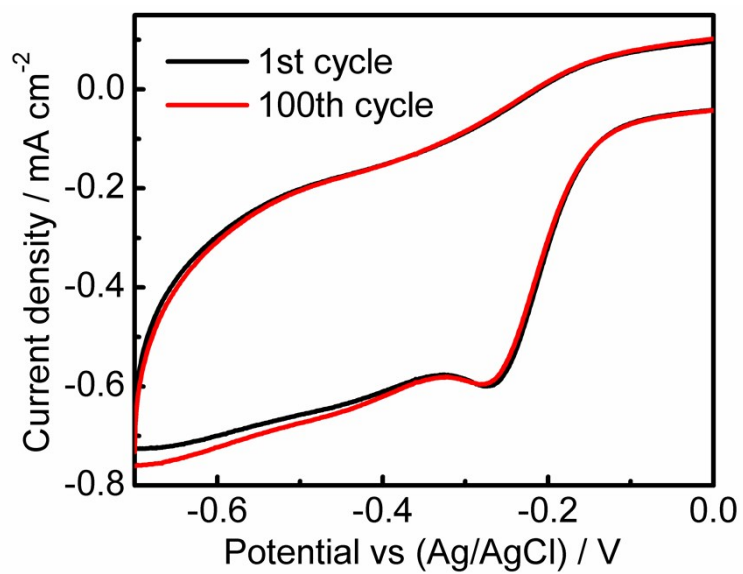

Fig. S2 CV curves ( $10 \text{ mV s}^{-1}$ ) of 1<sup>st</sup> and 100<sup>th</sup> cycle for TiN<sub>x</sub>O<sub>y</sub>-900

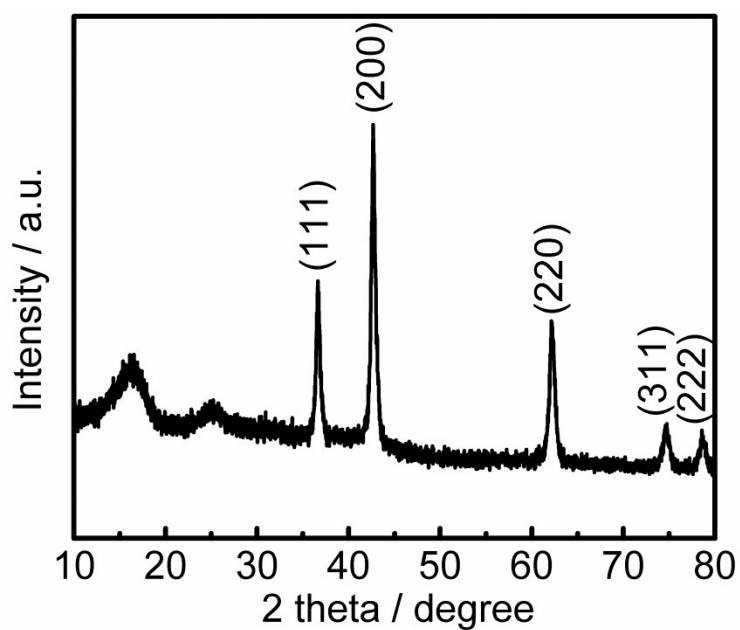

Fig. S3 XRD pattern of TiN<sub>x</sub>O<sub>y</sub>-900 after CV tests for 100 cycles

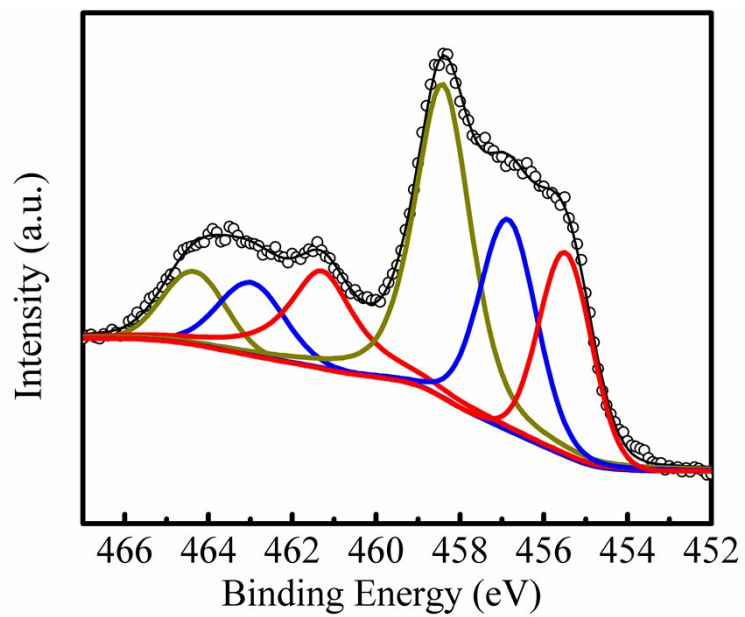

Fig. S4 Ti 2p XPS spectra of  $\text{TiN}_x\text{O}_y$ -900 after CV tests for 100 cycles

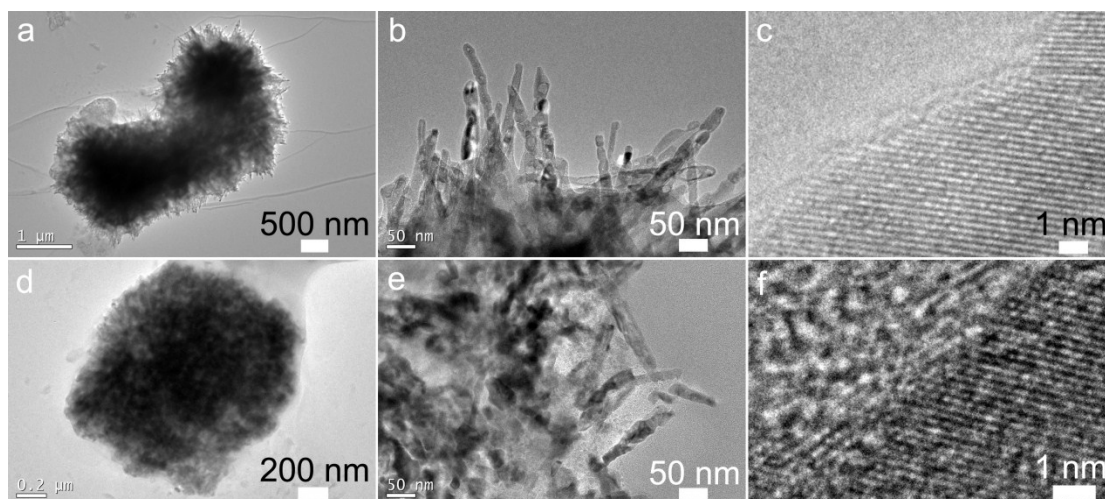

Fig. S5 TEM images of  $\text{TiN}_x\text{O}_y$ -900: (a-c) before cycling, (d-f) after cycling
